# Supplementary material for: Landscape Planning Integrated Approaches to Support Post-Wildfire Restoration in Natural Protected Areas: The Vesuvius National Park Case Study
Source: MDPI journal article supplement (doi:10.3390/land11071024), 2022-07-06
Supplement: s1 [file s1]

### Equations used for the four ES types maps processing

- Habitat Quality Equation:

$$Q_{xj} = H_j^* (1 - ((D_{xj}^z) / (D_{xj}^z - k_z))), \quad (3)$$

where  $Q_{xj}$  is the habitat quality in grid cell  $x$  with land-use/land-cover (LULC) type  $j$ ,  $H_j$  indicates the habitat suitability of LULC type  $j$ ,  $D_{xj}$  is the total threat level in grid cell  $x$ , with LULC or habitat type  $j$ , and  $k$  constant is the half-saturation constant (by default it is equal to 0.5).

- Recreation linear regression:

$$y_i = \beta_0 + \beta_1 x_{i1} + \dots + \beta_p x_{ip} \quad \text{for } i=1..n, \quad (4)$$

where  $\beta_{0,1,2,\dots,n}$  are coefficients of the regression,  $x_{ip}$  is the coverage of each attribute in each cell or polygon (hereafter called 'cell')  $i$ , within an area of interest containing  $n$  cells. Study period used were: 2016 as pre-fire analysis and 2017 as post-fire analysis.

- Pollination Equation:

$$YW(f) = v(f) (\sum_{x \in X(f)} PYW(x) / |X(f)|), \quad (5)$$

where  $YW(f)$  is the percentage of total crop yield attributable to wild pollinators,  $X(f)$  is the set of pixels covering farm " $f$ ", and  $|X(f)|$  is the count of pixels covered by farm " $f$ ",  $v(f)$  is a scalar function  $\in [0,1]$  which represents the percentage of crop yield grown on farm " $f$ ", and  $PYW(x)$  is the percentage of pollinator-dependent yield attributable to wild pollinators.

- Revised universal soil loss equation:

$$RUSLE_i = R_i \cdot K_i \cdot LS_i \cdot C_i \cdot P_i, \quad (6)$$

where  $R_i$  is rainfall erosivity,  $K_i$  is soil erodibility,  $LS_i$  is a slope length-gradient factor,  $C_i$  is a crop-management factor, and  $P_i$  is a support practice factor.
